# Supplementary material for: Mapping Temporally Ordered Inputs to Binary Message Outputs with a DNA Temporal Logic Circuit
Source: MDPI journal article supplement (doi:10.3390/nano13050903), 2023-02-27
Supplement: s1 [file s1]

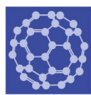

# Mapping Temporally Ordered Inputs to Binary Message Outputs with a DNA Temporal Logic Circuit

Shuai Zhao <sup>1,†</sup>, Yuan Liu <sup>2,†</sup>, Xiaokang Zhang <sup>2</sup>, Rui Qin <sup>1</sup>, Bin Wang <sup>1</sup> and Qiang Zhang <sup>1,\*</sup>

- <sup>1</sup> Key Laboratory of Advanced Design and Intelligent Computing, Ministry of Education, School of Software Engineering, Dalian University, Dalian 116622, China; second6s9@163.com (S.Z.); qinrui9850@163.com (R.Q.); wangbin@dlu.edu.cn (B.W.); zhangq@dlu.edu.cn (Q.Z.)  
<sup>2</sup> School of Computer Science and Technology, Dalian University of Technology, Dalian 116024, China; liuyuan.dlut@gmail.com (Y.L.); xiaokangzhangdl@gmail.com (X.Z.)  
 \* Correspondence: zhangq@dlu.edu.cn; Tel.: +86-0411-8740-2106  
 † These authors contributed equally to this work.

## S1. DNA Sequences Design and Modifications

We use the design module of NUPACK ([www.nupack.org](http://www.nupack.org)) for basic design of DNA sequences. Then manually modify the designed sequences to produce the details we need and use the analysis module of NUPACK to ensure that there are few undesirable interactions between DNA strands as possible.

**Table S1.** DNA sequences and modifications

| Strand | Sequence(5' to 3')                                                    | Length (nt) |
|--------|-----------------------------------------------------------------------|-------------|
| a1(O1) | 6-FAM-GATTCTTGATACGACTCTTG                                            | 20          |
| a2(O2) | ROX-GTCTCACTTGAACCTGTCT                                               | 20          |
| a3(O3) | CY5.5-CATCTTACATATCTTGATCT                                            | 20          |
| b1(K1) | AACCATCTCACTGTCTGAAC                                                  | 20          |
| K2     | TGGACA AACCATCTCACTGTCTGAAC                                           | 26          |
| K3     | CACTTC TGGACA AACCATCTCACTGTCTGAAC                                    | 32          |
| I1*    | GTTCAGACAGTGAGATGGTT TGTCCA CAAGAGTCGTATCAAGAATC-BHQ1                 | 46          |
| I2*    | GTTCAGACAGTGAGATGGTT TGTCCA GAAGTG AGACAGAGTTCAAGT GAGAC-BHQ2         | 52          |
| I3*    | GTTCAGACAGTGAGATGGTT TGTCCA GAAGTG ACCAGA AGATCAAGAT ATGTAAGATG-BHQ3  | 58          |
| I1     | GATTCTTGATACGACTCTTG TGGACA AACCATCTCACTGTCTGAAC                      | 46          |
| I2     | GTCTCACTTGAACCTGTCT CACTTC TGGACA AACCATCTCACTGTCTG AAC               | 52          |
| I3     | CATCTTACATATCTTGATCT TCTGGT CACTTC TGGACA AACCATCTCACTGTCTGAAC        | 58          |
| I4     | CTGTTCTCTAACTTCATCAG GTAAC TCTGGT CACTTC TGGACA AACCA TCTCACTGTCTGAAC | 64          |

Domains of the DNA temporal logic circuit are colored as follows:

Domains a1 (O1) and a1\*, domains a2 (O2) and a2\*, domains a3 (O3) and a3\*, domains a4, domains b1 (K1) and b1\*.

All toehold domains are highlighted as follows:

Domains t1 and t1\*, domains t2 and t2\*, domains t3 and t3\*, domains t4.

## S2. NUPACK Simulations

We use NUPACK to analyze the stability of DNA complexes (table S2).

Table S2. NUPACK simulations for DNA complexes.

| Complexes | MFE structure                                                                        |  |
|-----------|--------------------------------------------------------------------------------------|--|
|           | MFE proxy structure at 37°C                                                          |  |
| S1        | 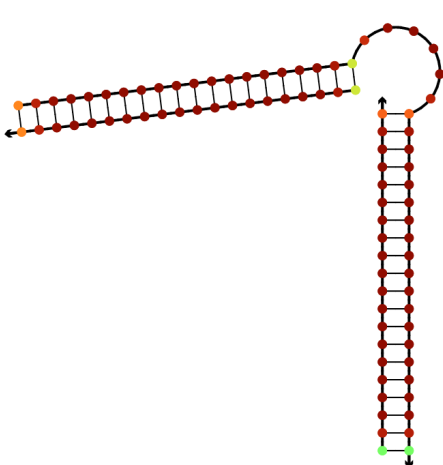   |  |
|           | Free energy of the secondary structure: -51.59 kcal/mol                              |  |
| S2        |   |  |
|           | Free energy of the secondary structure: -60.91 kcal/mol                              |  |
| S3        |  |  |
|           | Free energy of the secondary structure: -65.81 kcal/mol                              |  |

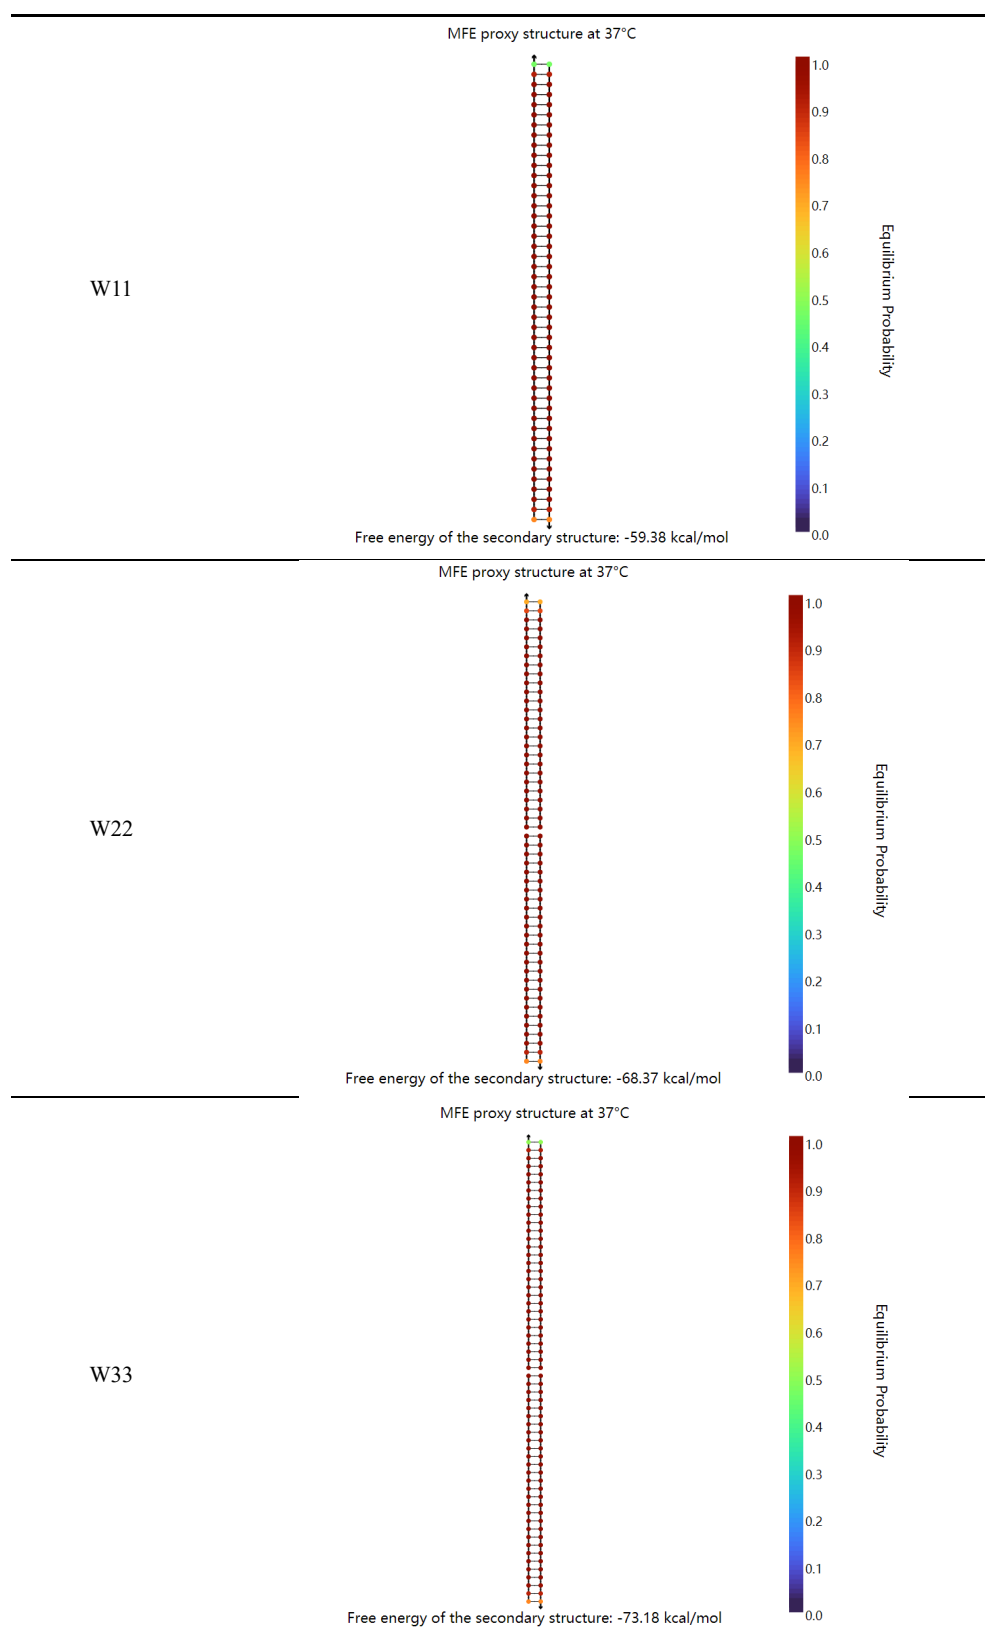

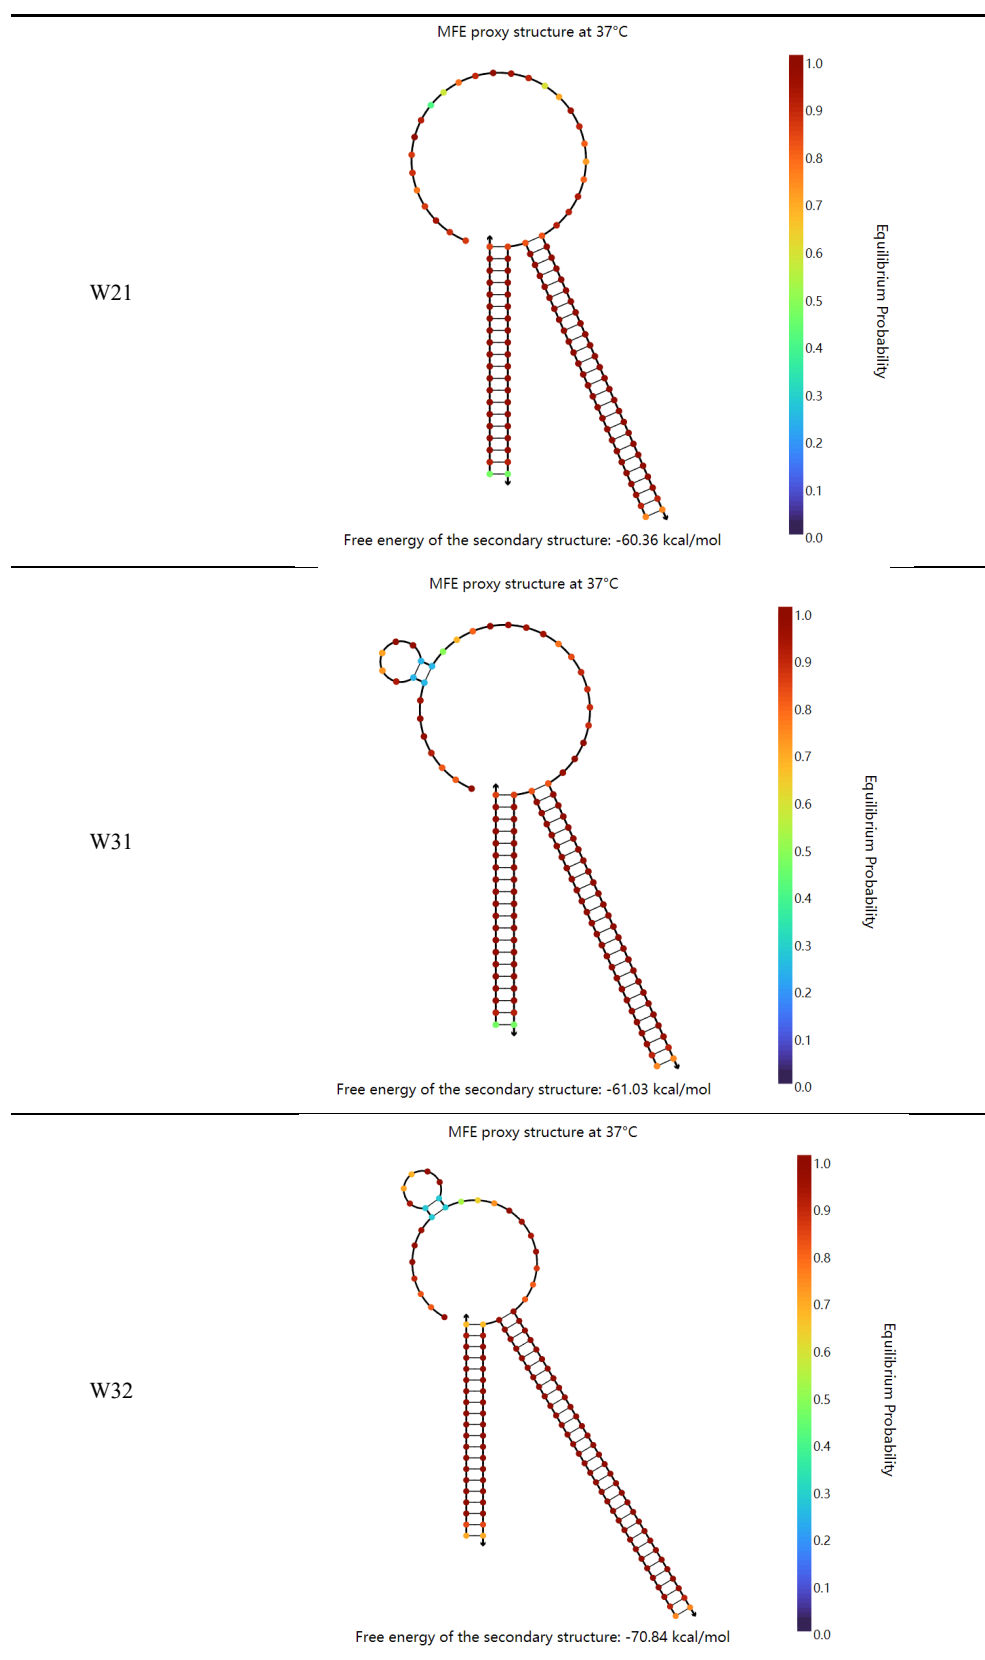

**S3. Reaction Simulations Model**

All release reactions were used to simulate output signal generation and modeled as follows:

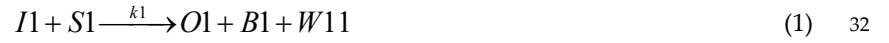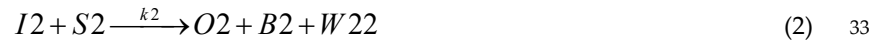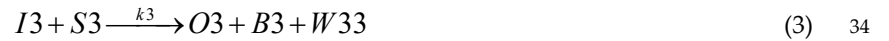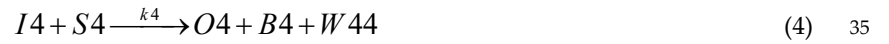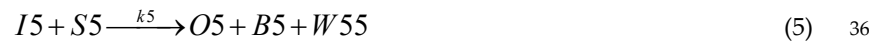

All inhibition reactions were used to simulate the inhibition of output signal and modeled as follows:

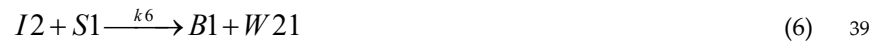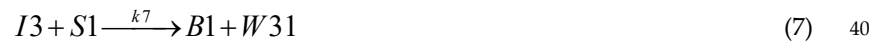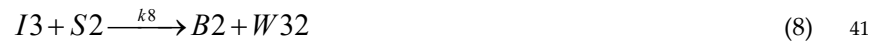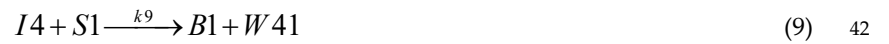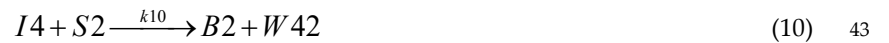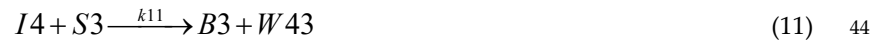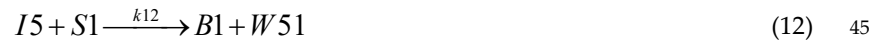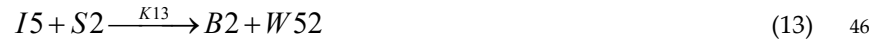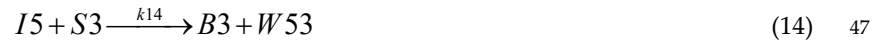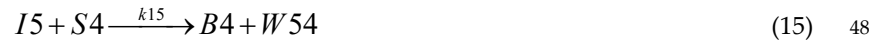

The following reactions were used to simulate substrates loss:

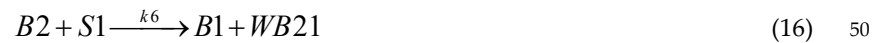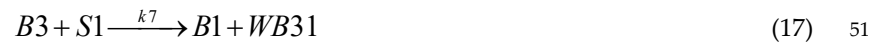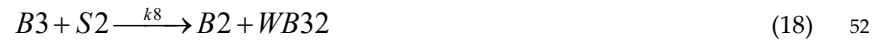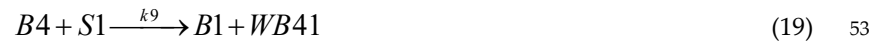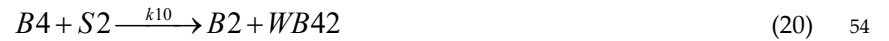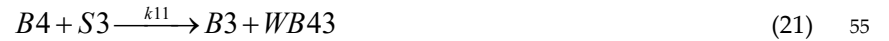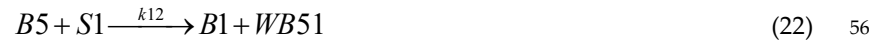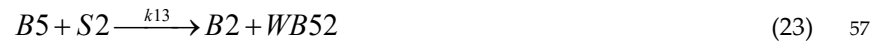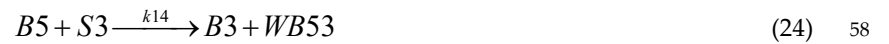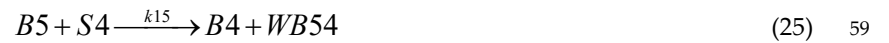

Since the reactions of the same substrate have the same toehold domain and branch migration domain and approximate symmetry of the reactions, we assume the same rate

constant for the reactions of the same substrate. In other words, we assume that  $k_1 = k_6 = k_7 = k_9 = k_{12}$ ,  $k_2 = k_8 = k_{10} = k_{13}$ ,  $k_3 = k_{11} = k_{14}$ ,  $k_4 = k_{15}$ .

According to the above reaction model, we can find that there are two types of reaction. One is a reaction of two reactants and three products that can be abstracted into the following equation:

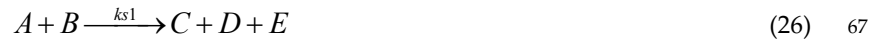

The other is that the reaction of two reactants and two products can be abstracted into the following equation:

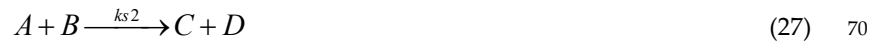

Therefore, the rate equation of the first reaction type can be derived:

$$d[C]/dt = d[D]/dt = d[E]/dt = k_{s1}[A][B] \quad (28)$$

When the initial condition is  $[A]_0$ ,  $[B]_0$ , the curve of products can be obtained either by integration or solving difference equations. For example, the differential equations above could be described by the following difference equations:

$$A(i+1) = A(i) - k_{s1} A(i) B(i) \quad (29)$$

$$B(i+1) = B(i) - k_{s1} A(i) B(i) \quad (30)$$

$$C(i+1) = C(i) + k_{s1} A(i) B(i) \quad (31)$$

$$D(i+1) = D(i) + k_{s1} A(i) B(i) \quad (32)$$

$$E(i+1) = E(i) + k_{s1} A(i) B(i) \quad (33)$$

Similarly, the reaction of the two products results in the following difference equation:

$$A(i+1) = A(i) - k_{s2} A(i) B(i) \quad (34)$$

$$B(i+1) = B(i) - k_{s2} A(i) B(i) \quad (35)$$

$$C(i+1) = C(i) + k_{s2} A(i) B(i) \quad (36)$$

$$D(i+1) = D(i) + k_{s2} A(i) B(i) \quad (37)$$

We use a python program to record the concentrations of reactants and products at each instant and create models based on reaction relationships. In the program, we set the initial concentration of all substrates. When an input is added, we assign an initial concentration to that input in the program and compute the difference equation for each reaction.

For the reaction model with three inputs and two substrates, all possible reactions that can occur are (1) (2) (6) (7) (8) (16) (17) (18).

For the reaction model with three inputs and three substrates, all possible reactions that can occur are (1) (2) (3) (6) (7) (8) (16) (17) (18).

For the reaction model with four inputs and three substrates, all possible reactions that can occur are (1) (2) (3) (6) (7) (8) (9) (10) (11) (16) (17) (18) (19) (20) (21).

For the reaction model with five inputs and five substrates, all possible reactions that can occur are (1) - (25). In this simulation model, the substrate loss was 0 because no actual experiments were performed. Therefore, the highest fluorescence results  $\Delta F / \Delta F_{\max}$  of all experimental results were 1.

## S4. Supplementary Data and Simulation

### S4.1. Temporal logic circuits with three inputs and two substrates

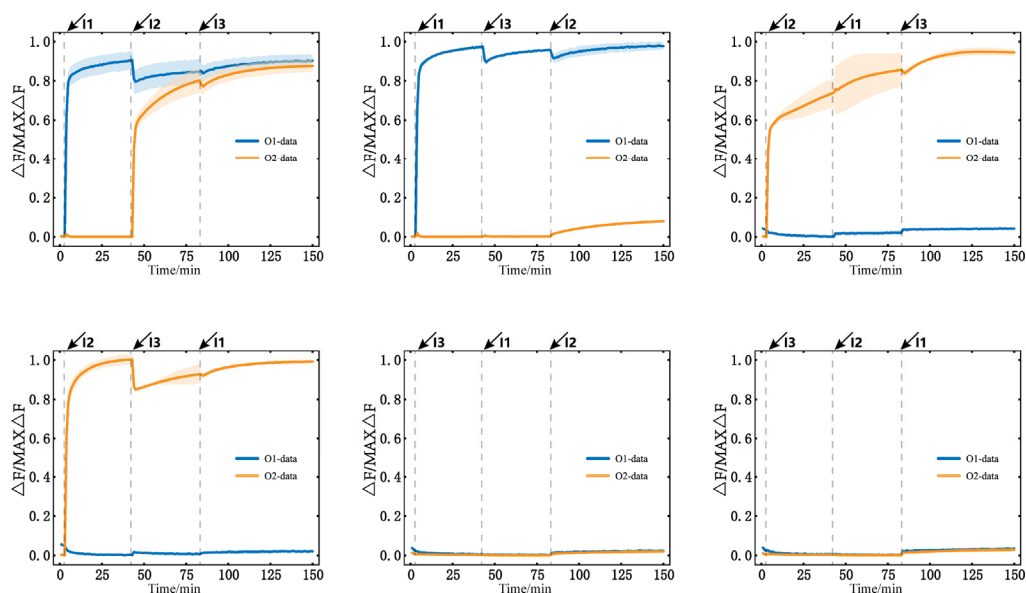

**Figure S1.** Data of three inputs and two substrates temporal logic circuit. All resulting plots contain error bars. We examined the experiment for all six orders of three inputs and plotted the fluorescence curves.

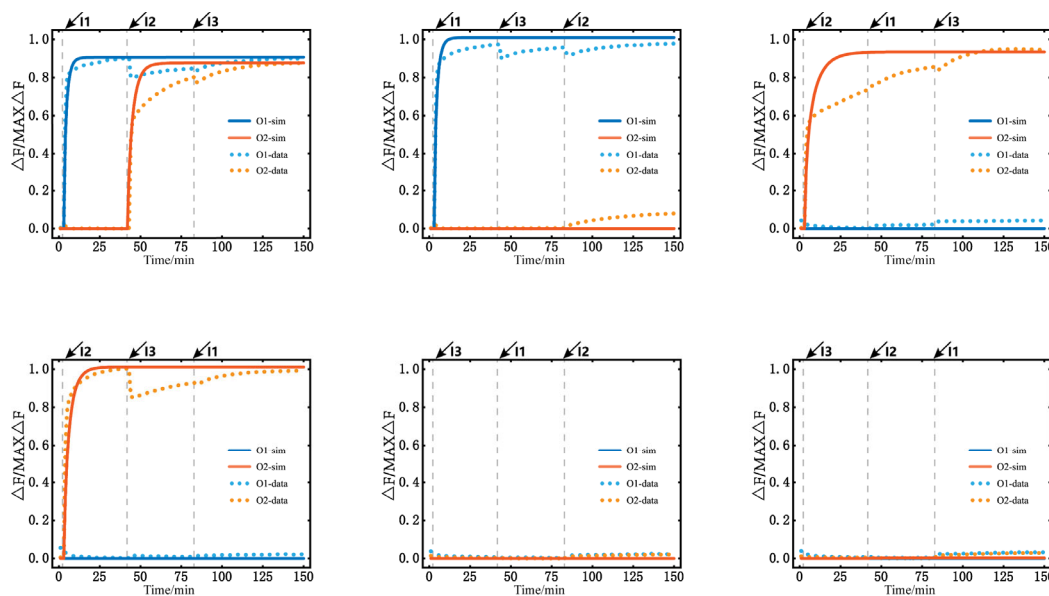

**Figure S2.** Data and simulation of three inputs and two substrates temporal logic circuit. The dashed line represents the real data and the solid line represents the simulation curve. The figure contains the results for all six orders for the three inputs.

## S4.2. Temporal logic circuits with three inputs and three substrates

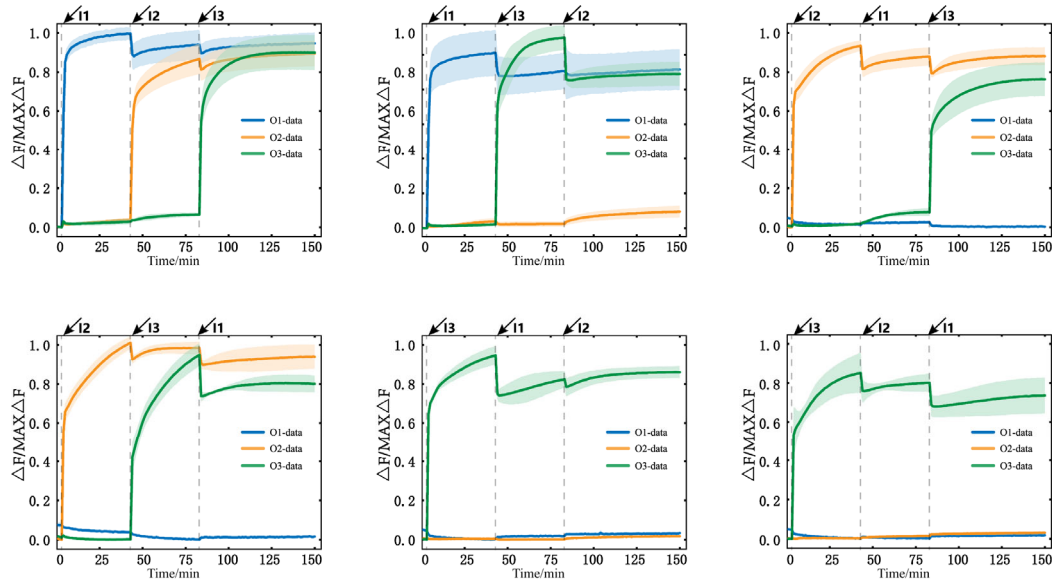

**Figure S3.** Data of three inputs and three substrates temporal logic circuit. All resulting plots contain error bars. We examined the experiment for all six orders of three inputs and plotted the fluorescence curves.

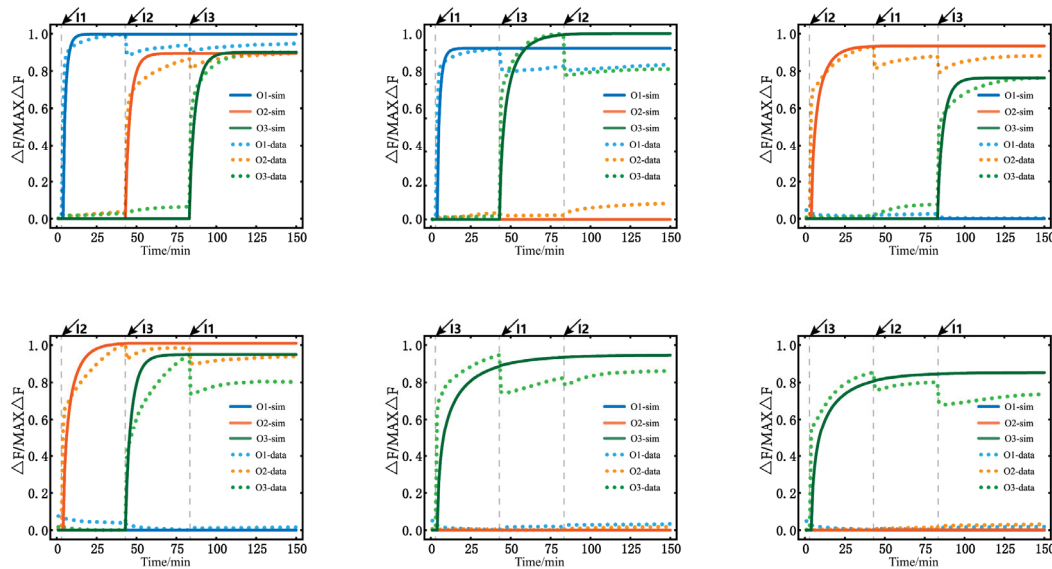

**Figure S4.** Data and simulation of three inputs and three substrates temporal logic circuit. The dashed line represents the real data and the solid line represents the simulation curve. The figure contains the results for all six orders for the three inputs.

S4.3. Temporal logic circuits with four inputs and three substrates

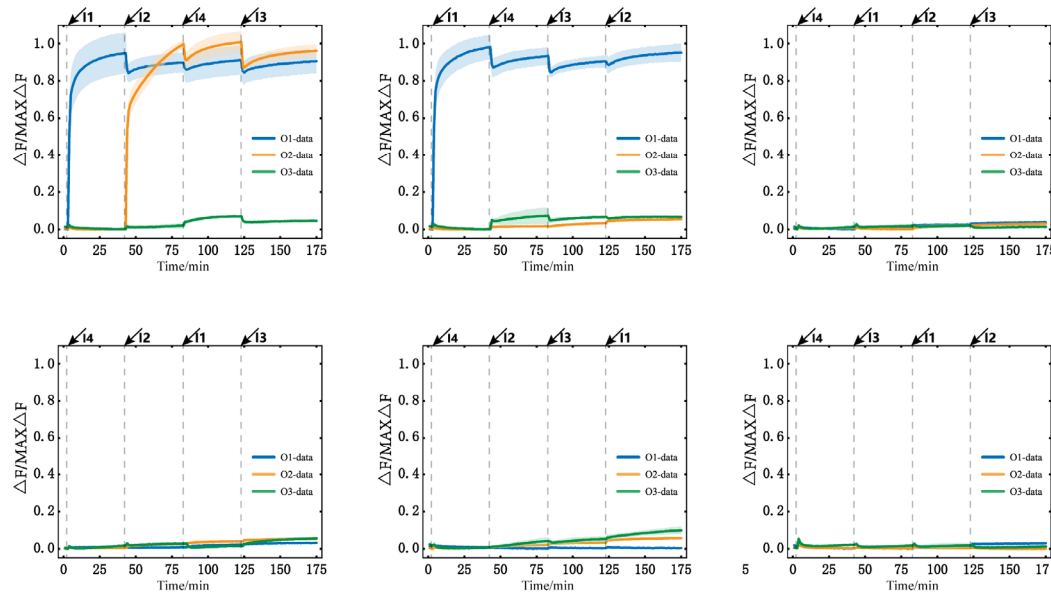

**Figure S5.** Data of four inputs and three substrates temporal logic circuit. Since we only examine the inhibitory effect of I4 here, the experiments were performed for six input orders only and suffice to show that the addition of I4 inhibits substrates S1, S2 and S3.

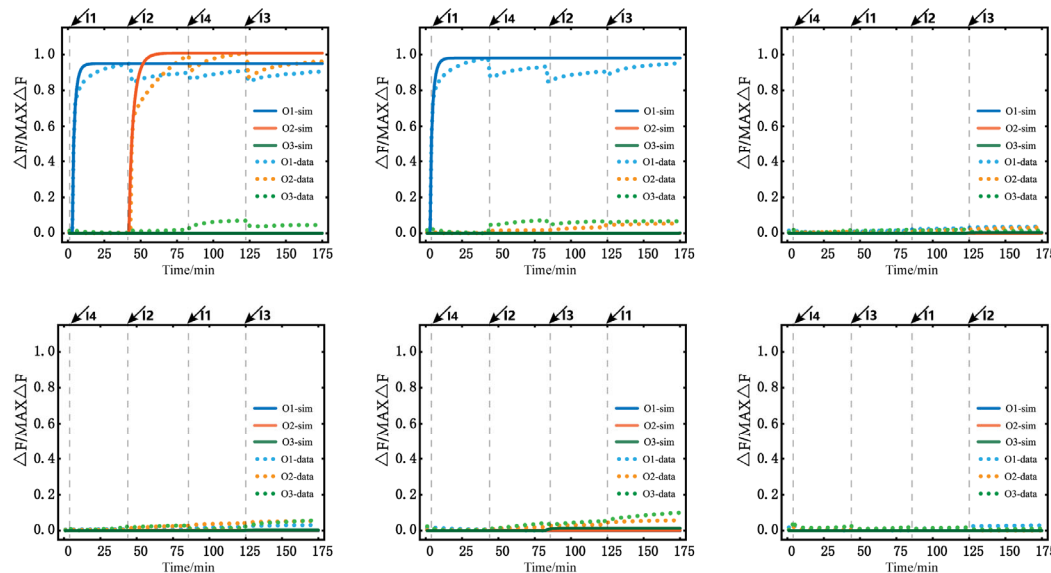

**Figure S6.** Data and simulation of four inputs and three substrates temporal logic circuit. The dashed line represents the real data and the solid line represents the simulation curve.

S5. Encoding and Decoding of Symmetric Encryption Applications

**Table S3.** Custom encoding and decoding of conversion between characters and binary message.

| Characters | Binary Message (plaintext message) |
|------------|------------------------------------|
| 1 A        | 00001                              |
| 2 B        | 00010                              |
| 3 C        | 00011                              |
| 4 D        | 00100                              |
| 5 E        | 00101                              |

|    |   |       |
|----|---|-------|
| 6  | F | 00110 |
| 7  | G | 00111 |
| 8  | H | 01000 |
| 9  | I | 01001 |
| 10 | J | 01010 |
| 11 | K | 01011 |
| 12 | L | 01100 |
| 13 | M | 01101 |
| 14 | N | 01110 |
| 15 | O | 01111 |
| 16 | P | 10000 |
| 17 | Q | 10001 |
| 18 | R | 10010 |
| 19 | S | 10011 |
| 20 | T | 10100 |
| 21 | U | 10101 |
| 22 | V | 10110 |
| 23 | W | 10111 |
| 24 | X | 11000 |
| 25 | Y | 11001 |
| 26 | Z | 11010 |

134

## S6. The Python Program Used by the Simulations Model

135

All programs are run in python3.8.5. The code for each simulation model is as follows.

136

137

### S6.1. Three inputs and two substrates

138

```
import matplotlib.pyplot as plt
import numpy
import openpyxl
```

139

140

141

142

```
plt.figure(figsize=(10, 8))
```

143

```
timeMM = 1
```

144

```
dataNum = 150
```

145

```
p = 0
```

146

147

```
real_xi = numpy.linspace(0, 0, dataNum)
```

148

```
real_fam = numpy.linspace(0, 0, dataNum)
```

149

```
real_rox = numpy.linspace(0, 0, dataNum)
```

150

```
real_cy5_5 = numpy.linspace(0, 0, dataNum)
```

151

```
wb = openpyxl.load_workbook('double/Order123.xlsx')
```

152

```
# wb = openpyxl.load_workbook('double /Order132.xlsx')
```

153

```
# wb = openpyxl.load_workbook('double /Order213.xlsx')
```

154

```
# wb = openpyxl.load_workbook('double /Order231.xlsx')
```

155

```
# wb = openpyxl.load_workbook('double /Order312.xlsx')
```

156

```
# wb = openpyxl.load_workbook('double /Order321.xlsx')
```

157

```
sheet = wb['Sheet1']
```

158

```
c_fam = 0
```

159

```
c_rox = 0
```

160

```
c_cy5_5 = 0
```

161

```
for i in range(0, dataNum):
```

162

```
    real_xi[i] = i
```

163

```
    real_fam[i] = sheet.cell(row=2 + i, column=1).value
```

164

```
    real_rox[i] = sheet.cell(row=2 + i, column=2).value
```

165

```
    real_cy5_5[i] = sheet.cell(row=2 + i, column=3).value
```

166

```

c_fam = max(c_fam, real_fam[i])
c_rox = max(c_rox, real_rox[i])
c_cy5_5 = max(c_cy5_5, real_cy5_5[i])

k1 = 0.00150
k2 = 0.00090
k3 = 0.00075

I1 = numpy.linspace(0, 0, dataNum)
I2 = numpy.linspace(0, 0, dataNum)
I3 = numpy.linspace(0, 0, dataNum)

S1 = numpy.linspace(0, 0, dataNum)
S2 = numpy.linspace(0, 0, dataNum)
S3 = numpy.linspace(0, 0, dataNum)

O1 = numpy.linspace(0, 0, dataNum)
O2 = numpy.linspace(0, 0, dataNum)
O3 = numpy.linspace(0, 0, dataNum)

B1 = numpy.linspace(0, 0, dataNum)
B2 = numpy.linspace(0, 0, dataNum)
B3 = numpy.linspace(0, 0, dataNum)

W11 = numpy.linspace(0, 0, dataNum)
W22 = numpy.linspace(0, 0, dataNum)
W33 = numpy.linspace(0, 0, dataNum)
W21 = numpy.linspace(0, 0, dataNum)
W31 = numpy.linspace(0, 0, dataNum)
W32 = numpy.linspace(0, 0, dataNum)
WB21 = numpy.linspace(0, 0, dataNum)
WB31 = numpy.linspace(0, 0, dataNum)
WB32 = numpy.linspace(0, 0, dataNum)

l = [I1, I2, I3, S1, S2, S3, O1, O2, O3, B1, B2, B3, W11, W22, W33, W21, W31, W32,
WB21, WB31, WB32]
xi = numpy.linspace(0, 0, dataNum)

n = 3

def initial():
    S1[0] = c_fam
    S2[0] = c_rox
    for i in range(0, dataNum):
        xi[i] = i
def reaction1(A, B, C, D, E, k, i):
    # A + B -> C + D + E
    if i + 1 < dataNum:
        det = k * A[i] * B[i]
        A[i + 1] = (A[i] - det) if A[i + 1] == 0 else (A[i + 1] - det)
        B[i + 1] = (B[i] - det) if B[i + 1] == 0 else (B[i + 1] - det)
        C[i + 1] = (C[i] + det) if C[i + 1] == 0 else (C[i + 1] + det)
        D[i + 1] = (D[i] + det) if D[i + 1] == 0 else (D[i + 1] + det)
        E[i + 1] = (E[i] + det) if E[i + 1] == 0 else (E[i + 1] + det)

```

```

def reaction2(A, B, C, D, k, i):
    # A + B -> C + D
    if i + 1 < dataNum:
        det = k * A[i] * B[i]
        A[i + 1] = (A[i] - det) if A[i + 1] == 0 else (A[i + 1] - det)
        B[i + 1] = (B[i] - det) if B[i + 1] == 0 else (B[i + 1] - det)
        C[i + 1] = (C[i] + det) if C[i + 1] == 0 else (C[i + 1] + det)
        D[i + 1] = (D[i] + det) if D[i + 1] == 0 else (D[i + 1] + det)

def reaction_parallel(Input, start, end):
    if start != 0:
        start -= 1
    Input[start] = n * 120
    for i in range(start, end):
        reaction1(I1, S1, O1, B1, W11, k1, i)
        reaction1(I2, S2, O2, B2, W22, k2, i)
        reaction2(I2, S1, B1, W21, k1, i)
        reaction2(I3, S1, B1, W31, k1, i)
        reaction2(I3, S2, B2, W32, k2, i)
        reaction2(B2, S1, B1, WB21, k1, i)
        reaction2(B3, S1, B1, WB31, k1, i)
        reaction2(B3, S2, B2, WB32, k2, i)

def reaction_orders(Input1, Input2, Input3, time):
    start = 0
    end = time
    reaction_parallel(Input1, start, end)

    start = time
    end = 2 * time
    reaction_parallel(Input2, start, end)

    start = 2 * time
    end = dataNum
    reaction_parallel(Input3, start, end)

def addInitial(xi, dataNum):
    ti = numpy.linspace(0, 0, dataNum)
    ti[0] = 0
    ti[1] = 0
    ti[2] = 0
    for i in range(0, dataNum):
        if i + 3 < dataNum:
            ti[i + 3] = abs(xi[i])

    return ti

initial()
reaction_orders(I1, I2, I3, 40)
# reaction_orders(I1,I3,I2,40)
# reaction_orders(I2, I1, I3, 40)
# reaction_orders(I2, I3, I1, 40)
# reaction_orders(I3, I1, I2, 40)

```

```

# reaction_orders(I3, I2, I1, 40)
275
O1 = addInitial(O1, dataNum)
276
O2 = addInitial(O2, dataNum)
277
O3 = addInitial(O3, dataNum)
278
279
280
ax=plt.gca()
281
ax.spines['top'].set_linewidth(2)
282
ax.spines['bottom'].set_linewidth(2)
283
ax.spines['left'].set_linewidth(2)
284
ax.spines['right'].set_linewidth(2)
285
286
plt.xlabel('Time(Min)', fontsize=20)
287
plt.ylabel('Fluorescence(n.u.)', fontsize=20)
288
289
plt.plot(real_xi,real_fam,color='#9BC2E6',linewidth=2.0,linestyle='--')
290
plt.plot(real_xi,real_rox,color='#F4B084',linewidth=2.0,linestyle='--')
291
292
plt.plot(xi, O1, color="#0070C0", label="O1", linewidth=6)
293
plt.plot(xi, O2, color="#ED7D31", label="O2", linewidth=6)
294
295
plt.tick_params(labelsize=20)
296
plt.legend(fontsize=20)
297
plt.show()
298

```

#### S6.2. Three inputs and three substrates

```

import matplotlib.pyplot as plt
300
import numpy
301
import openpyxl
302
303
plt.figure(figsize=(10, 8))
304
timeMM = 1
305
dataNum = 150
306
p = 0
307
308
real_xi = numpy.linspace(0, 0, dataNum)
309
real_fam = numpy.linspace(0, 0, dataNum)
310
real_rox = numpy.linspace(0, 0, dataNum)
311
real_cy5_5 = numpy.linspace(0, 0, dataNum)
312
# wb = openpyxl.load_workbook('triple/Order123.xlsx')
313
# wb = openpyxl.load_workbook('triple/Order132.xlsx')
314
# wb = openpyxl.load_workbook('triple/Order213.xlsx')
315
# wb = openpyxl.load_workbook('triple/Order231.xlsx')
316
# wb = openpyxl.load_workbook('triple/Order312.xlsx')
317
wb = openpyxl.load_workbook('triple/Order321.xlsx')
318
sheet = wb['Sheet1']
319
c_fam = 0
320
c_rox = 0
321
c_cy5_5 = 0
322
for i in range(0, dataNum):
323
    real_xi[i] = i
324
    real_fam[i] = sheet.cell(row=2 + i, column=1).value
325
    real_rox[i] = sheet.cell(row=2 + i, column=2).value
326
    real_cy5_5[i] = sheet.cell(row=2 + i, column=3).value
327

```

```

        c_fam = max(c_fam, real_fam[i])
        c_rox = max(c_rox, real_rox[i])
        c_cy5_5 = max(c_cy5_5, real_cy5_5[i])

    if c_fam < 40:
        c_fam = 120

    if c_rox < 40:
        c_rox = 120

    if c_cy5_5 < 40:
        c_cy5_5 = 120

    k1 = 0.00150
    k2 = 0.00090
    k3 = 0.00075

    I1 = numpy.linspace(0, 0, dataNum)
    I2 = numpy.linspace(0, 0, dataNum)
    I3 = numpy.linspace(0, 0, dataNum)

    S1 = numpy.linspace(0, 0, dataNum)
    S2 = numpy.linspace(0, 0, dataNum)
    S3 = numpy.linspace(0, 0, dataNum)

    O1 = numpy.linspace(0, 0, dataNum)
    O2 = numpy.linspace(0, 0, dataNum)
    O3 = numpy.linspace(0, 0, dataNum)

    B1 = numpy.linspace(0, 0, dataNum)
    B2 = numpy.linspace(0, 0, dataNum)
    B3 = numpy.linspace(0, 0, dataNum)

    W11 = numpy.linspace(0, 0, dataNum)
    W22 = numpy.linspace(0, 0, dataNum)
    W33 = numpy.linspace(0, 0, dataNum)
    W21 = numpy.linspace(0, 0, dataNum)
    W31 = numpy.linspace(0, 0, dataNum)
    W32 = numpy.linspace(0, 0, dataNum)
    WB21 = numpy.linspace(0, 0, dataNum)
    WB31 = numpy.linspace(0, 0, dataNum)
    WB32 = numpy.linspace(0, 0, dataNum)

    l = [I1, I2, I3, S1, S2, S3, O1, O2, O3, B1, B2, B3, W11, W22, W33, W21, W31, W32,
WB21, WB31, WB32]
    xi = numpy.linspace(0, 0, dataNum)
    n = 3

    def initial():

        S1[0] = c_fam
        S2[0] = c_rox
        S3[0] = c_cy5_5
        for i in range(0, dataNum):

```

```

        xi[i] = i
382
383
def reaction1(A, B, C, D, E, k, i):
384
    # A + B -> C + D + E
385
    if i + 1 < dataNum:
386
        det = k * A[i] * B[i]
387
        A[i + 1] = (A[i] - det) if A[i + 1] == 0 else (A[i + 1] - det)
388
        B[i + 1] = (B[i] - det) if B[i + 1] == 0 else (B[i + 1] - det)
389
        C[i + 1] = (C[i] + det) if C[i + 1] == 0 else (C[i + 1] + det)
390
        D[i + 1] = (D[i] + det) if D[i + 1] == 0 else (D[i + 1] + det)
391
        E[i + 1] = (E[i] + det) if E[i + 1] == 0 else (E[i + 1] + det)
392
393
def reaction2(A, B, C, D, k, i):
394
    # A + B -> C + D
395
    if i + 1 < dataNum:
396
        det = k * A[i] * B[i]
397
        A[i + 1] = (A[i] - det) if A[i + 1] == 0 else (A[i + 1] - det)
398
        B[i + 1] = (B[i] - det) if B[i + 1] == 0 else (B[i + 1] - det)
399
        C[i + 1] = (C[i] + det) if C[i + 1] == 0 else (C[i + 1] + det)
400
        D[i + 1] = (D[i] + det) if D[i + 1] == 0 else (D[i + 1] + det)
401
402
def reaction_parallel(Input, start, end):
403
    if start != 0:
404
        start -= 1
405
    Input[start] = n * 120
406
    for i in range(start, end):
407
        reaction1(I1, S1, O1, B1, W11, k1, i)
408
        reaction1(I2, S2, O2, B2, W22, k2, i)
409
        reaction1(I3, S3, O3, B3, W33, k3, i)
410
411
        reaction2(I2, S1, B1, W21, k1, i)
412
        reaction2(I3, S1, B1, W31, k1, i)
413
        reaction2(I3, S2, B2, W32, k2, i)
414
415
        reaction2(B2, S1, B1, WB21, k1, i)
416
        reaction2(B3, S1, B1, WB31, k1, i)
417
        reaction2(B3, S2, B2, WB32, k2, i)
418
419
def reaction_orders(Input1, Input2, Input3, time):
420
    # plt.title(Input1 + '-' + Input2 + '-' + Input3, fontsize=40)
421
    start = 0
422
    end = time
423
    reaction_parallel(Input1, start, end)
424
425
    start = time
426
    end = 2 * time
427
    reaction_parallel(Input2, start, end)
428
429
    start = 2 * time
430
    end = dataNum
431
    reaction_parallel(Input3, start, end)
432
433
def addInitial(xi, dataNum):
434
    ti = numpy.linspace(0, 0, dataNum)
435

```

```

        ti[0] = 0
        ti[1] = 0
        ti[2] = 0
        for i in range(0, dataNum):
            if i + 3 < dataNum:
                ti[i + 3] = abs(xi[i])

        return ti

    initial()
    # reaction_orders(I1, I2, I3, 40)
    # reaction_orders(I1,I3,I2,40)
    # reaction_orders(I2, I1, I3, 40)
    # reaction_orders(I2, I3, I1, 40)
    # reaction_orders(I3, I1, I2, 40)
    reaction_orders(I3, I2, I1, 40)

    O1 = addInitial(O1, dataNum)
    O2 = addInitial(O2, dataNum)
    O3 = addInitial(O3, dataNum)

    ax=plt.gca()
    ax.spines['top'].set_linewidth(2)
    ax.spines['bottom'].set_linewidth(2)
    ax.spines['left'].set_linewidth(2)
    ax.spines['right'].set_linewidth(2)

    plt.xlabel('Time(Min)', fontsize=20)
    plt.ylabel('Fluorescence(n.u.)', fontsize=20)

    plt.plot(real_xi,real_fam,color='#9BC2E6',linewidth=2.0,linestyle='--')
    plt.plot(real_xi,real_rox,color='#F4B084',linewidth=2.0,linestyle='--')
    plt.plot(real_xi,real_cy5_5,color='#A9D08E',linewidth=2.0,linestyle='--')

    plt.plot(xi, O1, color="#0070C0", label="O1", linewidth=6)
    plt.plot(xi, O2, color="#ED7D31", label="O2", linewidth=6)
    plt.plot(xi, O3, color="#548235", label="O3", linewidth=6)

    plt.tick_params(labelsize=20)
    plt.legend(fontsize=20)
    plt.show()

```

### S6.3. Four inputs and three substrates

```

import matplotlib.pyplot as plt
import numpy
import openpyxl

plt.figure(figsize=(10, 8))
timeMM = 1
dataNum = 175
p = 0

k1 = 0.00150
k2 = 0.00090

```

```

k3 = 0.00075
real_xi = numpy.linspace(0, 0, dataNum)
real_fam = numpy.linspace(0, 0, dataNum)
real_rox = numpy.linspace(0, 0, dataNum)
real_cy5_5 = numpy.linspace(0, 0, dataNum)

c_fam = 0
c_rox = 0
c_cy5_5 = 0

# wb = openpyxl.load_workbook('fourth/Order1243.xlsx')
# wb = openpyxl.load_workbook('fourth/Order1423.xlsx')
# wb = openpyxl.load_workbook('fourth/Order3412.xlsx')
# wb = openpyxl.load_workbook('fourth/Order4123.xlsx')
# wb = openpyxl.load_workbook('fourth/Order4213.xlsx')
# wb = openpyxl.load_workbook('fourth/Order4231.xlsx')
wb = openpyxl.load_workbook('fourth/Order4312.xlsx')
# wb = openpyxl.load_workbook('fourth/Order4321.xlsx')
sheet = wb['Sheet1']
for i in range(0, dataNum):
    real_xi[i] = i
    real_fam[i] = sheet.cell(row=2 + i, column=1).value
    real_rox[i] = sheet.cell(row=2 + i, column=2).value
    real_cy5_5[i] = sheet.cell(row=2 + i, column=3).value
    c_fam = max(c_fam, real_fam[i])
    c_rox = max(c_rox, real_rox[i])
    c_cy5_5 = max(c_cy5_5, real_cy5_5[i])

I1 = numpy.linspace(0, 0, dataNum)
I2 = numpy.linspace(0, 0, dataNum)
I3 = numpy.linspace(0, 0, dataNum)
I4 = numpy.linspace(0, 0, dataNum)
inputs = [I1, I2, I3, I4]
inputs_str = ["I1", "I2", "I3", "I4"]

S1 = numpy.linspace(0, 0, dataNum)
S2 = numpy.linspace(0, 0, dataNum)
S3 = numpy.linspace(0, 0, dataNum)

O1 = numpy.linspace(0, 0, dataNum)
O2 = numpy.linspace(0, 0, dataNum)
O3 = numpy.linspace(0, 0, dataNum)

B1 = numpy.linspace(0, 0, dataNum)
B2 = numpy.linspace(0, 0, dataNum)
B3 = numpy.linspace(0, 0, dataNum)

W11 = numpy.linspace(0, 0, dataNum)
W22 = numpy.linspace(0, 0, dataNum)
W33 = numpy.linspace(0, 0, dataNum)
W21 = numpy.linspace(0, 0, dataNum)
W31 = numpy.linspace(0, 0, dataNum)
W32 = numpy.linspace(0, 0, dataNum)
W41 = numpy.linspace(0, 0, dataNum)

```

```

W42 = numpy.linspace(0, 0, dataNum) 543
W43 = numpy.linspace(0, 0, dataNum) 544
WB21 = numpy.linspace(0, 0, dataNum) 545
WB31 = numpy.linspace(0, 0, dataNum) 546
WB32 = numpy.linspace(0, 0, dataNum) 547
548
l = [I1, I2, I3, I4, S1, S2, S3, O1, O2, O3, B1, B2, B3, W11, W22, W33, W21, W31, W32, 549
W41, W42, W43, WB21, WB31, WB32] 550
xi = numpy.linspace(0, 0, dataNum) 551
552
n = 3 553
554
def initial(): 555
    for obj in l: 556
        for i in range(dataNum): 557
            obj[i] = 0 558
559
    S1[0] = c_fam 560
    S2[0] = c_rox 561
    S3[0] = c_cy5_5 562
    for i in range(0, dataNum): 563
        xi[i] = i 564
565
def reaction1(A, B, C, D, E, k, i): 566
    # A + B -> C + D + E 567
    if i + 1 < dataNum: 568
        det = k * A[i] * B[i] 569
        A[i + 1] = (A[i] - det) if A[i + 1] == 0 else (A[i + 1] - det) 570
        B[i + 1] = (B[i] - det) if B[i + 1] == 0 else (B[i + 1] - det) 571
        C[i + 1] = (C[i] + det) if C[i + 1] == 0 else (C[i + 1] + det) 572
        D[i + 1] = (D[i] + det) if D[i + 1] == 0 else (D[i + 1] + det) 573
        E[i + 1] = (E[i] + det) if E[i + 1] == 0 else (E[i + 1] + det) 574
575
def reaction2(A, B, C, D, k, i): 576
    # A + B -> C + D 577
    if i + 1 < dataNum: 578
        det = k * A[i] * B[i] 579
        A[i + 1] = (A[i] - det) if A[i + 1] == 0 else (A[i + 1] - det) 580
        B[i + 1] = (B[i] - det) if B[i + 1] == 0 else (B[i + 1] - det) 581
        C[i + 1] = (C[i] + det) if C[i + 1] == 0 else (C[i + 1] + det) 582
        D[i + 1] = (D[i] + det) if D[i + 1] == 0 else (D[i + 1] + det) 583
584
def reaction_parallel(Input, start, end): 585
    if start != 0: 586
        start -= 1 587
    Input[start] = n * 120 588
    for i in range(start, end): 589
        # Release Reaction 590
        reaction1(I1, S1, O1, B1, W11, k1, i) 591
        reaction1(I2, S2, O2, B2, W22, k2, i) 592
        reaction1(I3, S3, O3, B3, W33, k3, i) 593
594
        # Inhibite Reaction 595
        reaction2(I2, S1, B1, W21, k1, i) 596

```

```
reaction2(I3, S1, B1, W31, k1, i) 597
reaction2(I3, S2, B2, W32, k2, i) 598
reaction2(I4, S1, B1, W41, k1, i) 599
reaction2(I4, S2, B2, W42, k2, i) 600
reaction2(I4, S3, B3, W43, k3, i) 601
602
# Kill Reaction 603
reaction2(B2, S1, B1, WB21, k1, i) 604
reaction2(B3, S1, B1, WB31, k1, i) 605
reaction2(B3, S2, B2, WB32, k2, i) 606
607
def reaction_orders(Input1, Input2, Input3, Input4, time, isOpen = False): 608
    initial() 609
    start = 0 610
    end = time 611
    reaction_parallel(Input1, start, end) 612
    613
    start = time 614
    end = 2 * time 615
    reaction_parallel(Input2, start, end) 616
    617
    start = 2 * time 618
    end = 3 * time 619
    reaction_parallel(Input3, start, end) 620
    621
    start = 3 * time 622
    end = dataNum 623
    reaction_parallel(Input4, start, end) 624
    625
    if isOpen: 626
        openall(xi) 627
    628
def show(): 629
    ax=plt.gca() 630
    ax.spines['top'].set_linewidth(2) 631
    ax.spines['bottom'].set_linewidth(2) 632
    ax.spines['left'].set_linewidth(2) 633
    ax.spines['right'].set_linewidth(2) 634
    635
    plt.xlabel('Time(S)', fontsize=20) 636
    plt.ylabel('Concentration(NM)', fontsize=20) 637
    638
    plt.plot(xi, O1, color="green", label="O1", linewidth=6) 639
    plt.plot(xi, O2, color="orange", label="O2", linewidth=6) 640
    plt.plot(xi, O3, color="blue", label="O3", linewidth=6) 641
    plt.tick_params(labelsize=20) 642
    plt.legend(fontsize=20) 643
    plt.show() 644
    645
def addInitial(xi, dataNum): 646
    ti = numpy.linspace(0, 0, dataNum) 647
    ti[0] = 0 648
    ti[1] = 0 649
    ti[2] = 0 650
```

```

        for i in range(0, dataNum):
            if i + 3 < dataNum:
                ti[i + 3] = abs(xi[i])

    return ti

    flag = False
    # reaction_orders(I1,I2,I4,I3,40,flag)
    # reaction_orders(I1,I4,I2,I3,40,flag)
    # reaction_orders(I3,I4,I1,I2,40,flag)
    # reaction_orders(I4,I1,I2,I3,40,flag)
    # reaction_orders(I4,I2,I1,I3,40,flag)
    # reaction_orders(I4,I2,I3,I1,40,flag)
    reaction_orders(I4,I3,I1,I2,40,flag)
    # reaction_orders(I4,I3,I2,I1,40,flag)
    O1 = addInitial(O1, dataNum)
    O2 = addInitial(O2, dataNum)
    O3 = addInitial(O3, dataNum)

    ax=plt.gca()
    ax.spines['top'].set_linewidth(2)
    ax.spines['bottom'].set_linewidth(2)
    ax.spines['left'].set_linewidth(2)
    ax.spines['right'].set_linewidth(2)

    plt.xlabel('Time(Min)', fontsize=20)
    plt.ylabel('Fluorescence(n.u.)', fontsize=20)

    plt.plot(real_xi,real_fam,color='#9BC2E6',linewidth=2.0,linestyle='--')
    plt.plot(real_xi,real_rox,color='#F4B084',linewidth=2.0,linestyle='--')
    plt.plot(real_xi,real_cy5_5,color='#A9D08E',linewidth=2.0,linestyle='--')

    plt.plot(xi, O1, color="#0070C0", label="O1", linewidth=6)
    plt.plot(xi, O2, color="#ED7D31", label="O2", linewidth=6)
    plt.plot(xi, O3, color="#548235", label="O3", linewidth=6)

    plt.tick_params(labelsize=20)
    plt.legend(fontsize=20)
    plt.show()

```

#### S6.4. Five inputs and five substrates

```

import matplotlib.pyplot as plt
import numpy

plt.figure(figsize=(10, 8))
timeMM = 1
dataNum = 200
p = 0

k1 = 0.00150
k2 = 0.00090
k3 = 0.00075
k4 = 0.00070
k5 = 0.00065

```

```
c = 100
n = 5

I1 = numpy.linspace(0, 0, dataNum)
I2 = numpy.linspace(0, 0, dataNum)
I3 = numpy.linspace(0, 0, dataNum)
I4 = numpy.linspace(0, 0, dataNum)
I5 = numpy.linspace(0, 0, dataNum)
inputs = [I1, I2, I3, I4, I5]
inputs_str = ["I1", "I2", "I3", "I4", "I5"]

S1 = numpy.linspace(0, 0, dataNum)
S2 = numpy.linspace(0, 0, dataNum)
S3 = numpy.linspace(0, 0, dataNum)
S4 = numpy.linspace(0, 0, dataNum)
S5 = numpy.linspace(0, 0, dataNum)

O1 = numpy.linspace(0, 0, dataNum)
O2 = numpy.linspace(0, 0, dataNum)
O3 = numpy.linspace(0, 0, dataNum)
O4 = numpy.linspace(0, 0, dataNum)
O5 = numpy.linspace(0, 0, dataNum)

B1 = numpy.linspace(0, 0, dataNum)
B2 = numpy.linspace(0, 0, dataNum)
B3 = numpy.linspace(0, 0, dataNum)
B4 = numpy.linspace(0, 0, dataNum)
B5 = numpy.linspace(0, 0, dataNum)

W11 = numpy.linspace(0, 0, dataNum)
W22 = numpy.linspace(0, 0, dataNum)
W33 = numpy.linspace(0, 0, dataNum)
W44 = numpy.linspace(0, 0, dataNum)
W55 = numpy.linspace(0, 0, dataNum)

W21 = numpy.linspace(0, 0, dataNum)
W31 = numpy.linspace(0, 0, dataNum)
W32 = numpy.linspace(0, 0, dataNum)
W41 = numpy.linspace(0, 0, dataNum)
W42 = numpy.linspace(0, 0, dataNum)
W43 = numpy.linspace(0, 0, dataNum)
W51 = numpy.linspace(0, 0, dataNum)
W52 = numpy.linspace(0, 0, dataNum)
W53 = numpy.linspace(0, 0, dataNum)
W54 = numpy.linspace(0, 0, dataNum)
WB21 = numpy.linspace(0, 0, dataNum)
WB31 = numpy.linspace(0, 0, dataNum)
WB32 = numpy.linspace(0, 0, dataNum)
WB43 = numpy.linspace(0, 0, dataNum)
WB42 = numpy.linspace(0, 0, dataNum)
WB41 = numpy.linspace(0, 0, dataNum)
WB51 = numpy.linspace(0, 0, dataNum)
WB52 = numpy.linspace(0, 0, dataNum)
```

```

WB53 = numpy.linspace(0, 0, dataNum)
WB54 = numpy.linspace(0, 0, dataNum)

l = [I1, I2, I3, I4, I5, S1, S2, S3, S4, S5, O1, O2, O3, O4, O5, B1, B2, B3, B4, B5, W11, W22,
W33, W44, W55, W21, W31, W32, W41, W42, W43, W51, W52, W53, W54, WB21, WB31,
WB32, WB41, WB42, WB43, WB51, WB52, WB53, WB54]
xi = numpy.linspace(0, 0, dataNum)

def initial():

    for obj in l:
        for i in range(dataNum):
            obj[i] = 0

    S1[0] = c
    S2[0] = c
    S3[0] = c
    S4[0] = c
    S5[0] = c
    for i in range(0, dataNum):
        xi[i] = i

def reaction1(A, B, C, D, E, k, i):
    # A + B -> C + D + E
    if i + 1 < dataNum:
        det = k * A[i] * B[i]
        A[i + 1] = (A[i] - det) if A[i + 1] == 0 else (A[i + 1] - det)
        B[i + 1] = (B[i] - det) if B[i + 1] == 0 else (B[i + 1] - det)
        C[i + 1] = (C[i] + det) if C[i + 1] == 0 else (C[i + 1] + det)
        D[i + 1] = (D[i] + det) if D[i + 1] == 0 else (D[i + 1] + det)
        E[i + 1] = (E[i] + det) if E[i + 1] == 0 else (E[i + 1] + det)

def reaction2(A, B, C, D, k, i):
    # A + B -> C + D
    if i + 1 < dataNum:
        det = k * A[i] * B[i]
        A[i + 1] = (A[i] - det) if A[i + 1] == 0 else (A[i + 1] - det)
        B[i + 1] = (B[i] - det) if B[i + 1] == 0 else (B[i + 1] - det)
        C[i + 1] = (C[i] + det) if C[i + 1] == 0 else (C[i + 1] + det)
        D[i + 1] = (D[i] + det) if D[i + 1] == 0 else (D[i + 1] + det)

def reaction_parallel(Input, start, end):
    if start != 0:
        start -= 1
    Input[start] = n * c
    for i in range(start, end):
        # Release Reaction
        reaction1(I1, S1, O1, B1, W11, k1, i)
        reaction1(I2, S2, O2, B2, W22, k2, i)
        reaction1(I3, S3, O3, B3, W33, k3, i)
        reaction1(I4, S4, O4, B4, W44, k4, i)
        reaction1(I5, S5, O5, B5, W55, k5, i)

        # Inhibite Reaction

```

```

        reaction2(I2, S1, B1, W21, k1, i) 812
        reaction2(I3, S1, B1, W31, k1, i) 813
        reaction2(I3, S2, B2, W32, k2, i) 814
        reaction2(I4, S1, B1, W41, k1, i) 815
        reaction2(I4, S2, B2, W42, k2, i) 816
        reaction2(I4, S3, B3, W43, k3, i) 817
        reaction2(I5, S1, B1, W51, k1, i) 818
        reaction2(I5, S2, B2, W52, k2, i) 819
        reaction2(I5, S3, B3, W53, k3, i) 820
        reaction2(I5, S4, B4, W54, k4, i) 821
        822
        # Kill Reaction 823
        reaction2(B2, S1, B1, WB21, k1, i) 824
        reaction2(B3, S1, B1, WB31, k1, i) 825
        reaction2(B3, S2, B2, WB32, k2, i) 826
        reaction2(B4, S1, B1, WB41, k1, i) 827
        reaction2(B4, S2, B2, WB42, k2, i) 828
        reaction2(B4, S3, B3, WB43, k3, i) 829
        reaction2(B5, S1, B1, WB51, k1, i) 830
        reaction2(B5, S2, B2, WB52, k2, i) 831
        reaction2(B5, S3, B3, WB53, k3, i) 832
        reaction2(B5, S4, B4, WB54, k4, i) 833
        834
def reaction_orders(Input1, Input2, Input3, Input4, Input5, time, isOpen = False): 835
    initial() 836
    start = 0 837
    end = time 838
    reaction_parallel(Input1, start, end) 839
    840
    start = time 841
    end = 2 * time 842
    reaction_parallel(Input2, start, end) 843
    844
    start = 2 * time 845
    end = 3 * time 846
    reaction_parallel(Input3, start, end) 847
    848
    start = 3 * time 849
    end = 4 * time 850
    reaction_parallel(Input4, start, end) 851
    852
    start = 4 * time 853
    end = dataNum 854
    reaction_parallel(Input5, start, end) 855
    856
    if isOpen: 857
        openall(xi) 858
    859
    # showALLData(dataNum) 860
    show() 861
    862
def show(): 863
    ax=plt.gca() 864
    ax.spines['top'].set_linewidth(2) 865

```

```
ax.spines['bottom'].set_linewidth(2) 866
ax.spines['left'].set_linewidth(2) 867
ax.spines['right'].set_linewidth(2) 868
869
plt.xlabel('Time(S)', fontsize=20) 870
plt.ylabel('Concentration(NM)', fontsize=20) 871
872
plt.plot(xi, O1, color="green", label="O1", linewidth=6) 873
plt.plot(xi, O2, color="orange", label="O2", linewidth=6) 874
plt.plot(xi, O3, color="blue", label="O3", linewidth=6) 875
plt.plot(xi, O4, color="red", label="O4", linewidth=6) 876
plt.plot(xi, O5, color="black", label="O5", linewidth=6) 877
878
plt.tick_params(labelsize=20) 879
plt.legend(fontsize=20) 880
plt.show() 881
882
flag = False 883
# reaction_orders(I2, I3, I1, I5, I4, 40, flag) 884
# reaction_orders(I3, I2, I5, I4, I1, 40, flag) 885
# reaction_orders(I1, I3, I5, I4, I2, 40, flag) 886
reaction_orders(I2, I4, I3, I5, I1, 40, flag) 887
```
